# Supplementary material for: TNF-α-stimulated nucleus pulposus cells induce cell apoptosis through the release of exosomal miR-16 targeting IGF-1 and IGF-1R in rats
Source: PubMed Central journal article supplement — Ann Transl Med. 2021 Sep;9(17):1376. doi: 10.21037/atm-21-227 (PMC8506555; doi:10.21037/atm-21-227), 2021-09
Supplement: atm-09-17-1376-dss.pdf [file atm-09-17-1376-dss.pdf]

## Data Sharing Statement

|                     |                                                                                                                                                    |                                                                                                                                  |
|---------------------|----------------------------------------------------------------------------------------------------------------------------------------------------|----------------------------------------------------------------------------------------------------------------------------------|
| <b>Article Info</b> | <a href="https://dx.doi.org/10.21037/atm-21-227">https://dx.doi.org/10.21037/atm-21-227</a>                                                        |                                                                                                                                  |
| <b>Item</b>         | <b>Question</b>                                                                                                                                    | <b>Authors' Response<br/>(place "-" if not applicable)</b>                                                                       |
| 1                   | Would you like to share data collected for your study to others?                                                                                   | NO                                                                                                                               |
| 2                   | If not, would you like to share the reason for your decision?                                                                                      | At present, some test data will provide a basis for our next test, which cannot be shared for the time being, please understand. |
| 3                   | What data in particular will be shared?                                                                                                            | -                                                                                                                                |
| 4                   | Any other documents will be share? Such as study protocol, statistical analysis plan, informed consent form, clinical study report, analytic code. | NO                                                                                                                               |
| 5                   | When will data availability begin?                                                                                                                 | -                                                                                                                                |
| 6                   | When will data availability end?                                                                                                                   | -                                                                                                                                |
| 7                   | To whom will you share the data?                                                                                                                   | -                                                                                                                                |
| 8                   | For what type of analysis or purpose?                                                                                                              | -                                                                                                                                |
| 9                   | How or where can the data/documents be obtained?                                                                                                   | -                                                                                                                                |
| 10                  | Any other restrictions?                                                                                                                            | If you are concerned with any part of our research, you can communicate with us by email. Thank you.                             |
